# Supplementary material
Source: Springer Nature journal article supplement (https://mijn.bsl.nl/resource/supplementary/13047_2009_109_MOESM2_ESM.pdf/7109834)

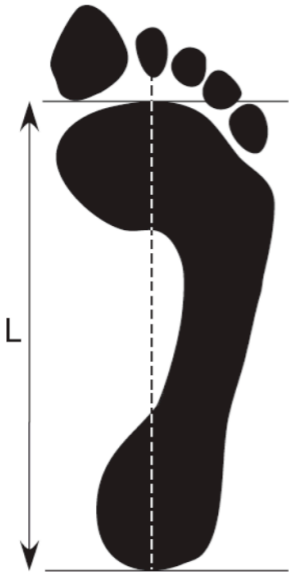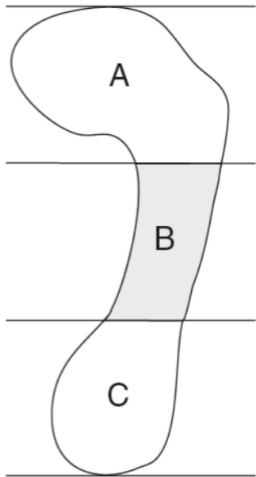

Supplement: MOESM2 [file 7109834]
